# Supplementary material
Source: PubMed Central journal article supplement (PMC1257694)
Supplement: pnas_0502659102_3.pdf [file pnas_0502659102_3.pdf]

**Table 4. Other parameters of the model**

| Parameter           | Definition                                                                                                      | Value and units       |                          |                       | Source |
|---------------------|-----------------------------------------------------------------------------------------------------------------|-----------------------|--------------------------|-----------------------|--------|
|                     |                                                                                                                 | Cameroon              | Guatemala                | Venezuela             |        |
| $\sigma_L$          | Per capita mortality rate of L3 larvae                                                                          |                       | 104 yr <sup>-1</sup>     |                       | 1, 2   |
| $\mu_V$             | Per capita mortality rate of uninfected vectors                                                                 |                       | 52 yr <sup>-1</sup>      |                       | 1, 2   |
| $\alpha_V$          | Excess vector mortality rate induced per microfilariae (mf)                                                     | 0.60 yr <sup>-1</sup> | 0.43 yr <sup>-1</sup>    | 0.60 yr <sup>-1</sup> | 2      |
| $\phi$              | Adult worm mating probability                                                                                   |                       | 1                        |                       | 1, 3   |
| $F$                 | Per capita fecundity rate of female adult worm scaled per mg of skin                                            |                       | 0.67 yr <sup>-1</sup>    |                       | 1, 4   |
| $\delta_{H_0}$      | Maximum establishment probability of an L3 larva within a human (as transmission rate tends to zero)            |                       | $8.54 \times 10^{-2}$    |                       | *      |
| $\delta_{H_\infty}$ | Minimum establishment probability of an L3 larva within a human (as transmission rate becomes infinitely large) |                       | $2.99 \times 10^{-2}$    |                       | 2      |
| $c_H$               | Severity of transmission rate-dependent constraints upon larval establishment within humans                     |                       | $5.86 \times 10^{-3}$ yr |                       | 2      |
| $\delta_{V_0}$      | Probability that a mf becomes an L3 larva within the vector (in the absence of density dependence)              | 0.0050                | 0.0005                   | 0.0015                | †      |
| $a_H$               | Probability that an L3 larva is shed during a blood meal                                                        |                       | 0.5                      |                       | 5, 6   |

\*In line with the value of  $7.12 \times 10^{-2}$  ( $3.82 \times 10^{-2}$ ,  $14.91 \times 10^{-2}$ ) estimated in ref. 2.

†The difference with respect to values previously estimated (2) compensates for the lack of density-dependent larval establishment within the vector in this model and is consistent with the relative competence of the various vector species.

1. Basáñez, M.-G. & Boussinesq, M. (1999) *Philos. Trans. R. Soc. London B* **354**, 809–826.
2. Basáñez, M.-G., Collins, R. C., Porter, C. H., Little, M. P. & Brandling-Bennett, D. (2002) *Am. J. Trop. Med. Hyg.* **67**, 669–679.
3. Anderson, R. M. & May, R. M. (1991) *Infectious Diseases of Humans: Dynamics and Control* (Oxford Univ. Press, Oxford).
4. Duke, B. O. L. (1993) *Trop. Med. Parasitol.* **44**, 61–68.

5. Renz, A., Fuglsang, H. & Anderson, J. (1987) *Ann. Trop. Med. Parasitol.* **81**, 253–262.
6. Renz, A. (1987) *Ann. Trop. Med. Parasitol.* **81**, 239–252.
